# Supplementary material
Source: PubMed Central journal article supplement (PMC7726030)
Supplement: NIHMS1630866-supplement-1.pdf [file NIHMS1630866-supplement-1.pdf]

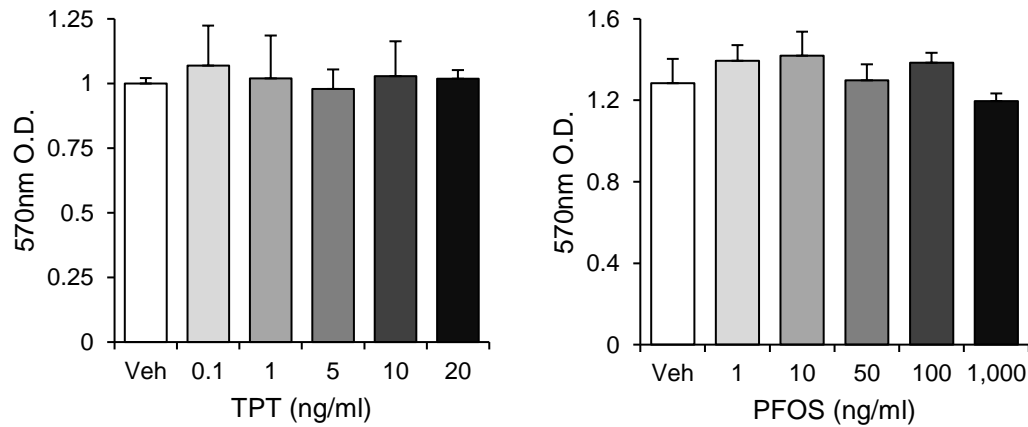

**Supplemental Figure 1.** Cytotoxicity assay for triphenyltin chloride (TPT, range: 0.1 - 20 ng/ml) and perfluorooctanesulfonic acid (PFOS, 1 - 1,000 ng/ml) in pre-luteinized ovine theca cells after 72 h of exposure. Data are expressed as mean  $\pm$  SEM. N = 3 primary theca cell cultures. No significant differences between exposure concentrations were detected. Veh: DMSO vehicle control. O.D.: optical density.
